# Supplementary material for: A self-cleaning TiO2 coated mesh with robust underwater superoleophobicity for oil/water separation in a complex environment
Source: Royal Society of Chemistry journal article supplement (doi:10.1039/c6ra13847k), 2016-01-01
Supplement: c6ra13847k1.pdf [file c6ra13847k1.pdf]

## Supporting information for

A self-cleaning TiO<sub>2</sub> coated mesh with robust underwater superoleophobicity for oil/water separation in complex environment

Zhe-Qin Dong, Bao-Juan Wang, Min Liu, Xiao-Hua Ma, Zhen-Liang Xu \*

State Key Laboratory of Chemical Engineering, Membrane Science and Engineering R&D Lab, Chemical Engineering Research Center, East China University of Science and Technology (ECUST), 130 Meilong Road, Shanghai 200237, China

\*Corresponding author: [chemxuzl@ecust.edu.cn](mailto:chemxuzl@ecust.edu.cn) (Z-L. Xu)

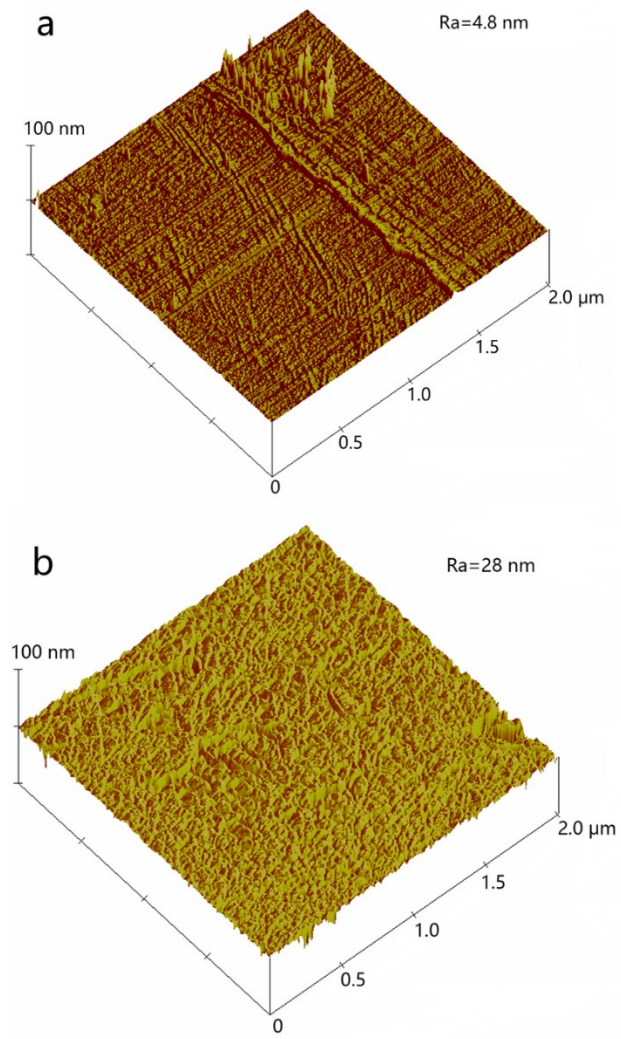

Figure S1. 3D AFM images of (a) pristine stainless mesh and (b)  $\text{TiO}_2$  coated mesh.

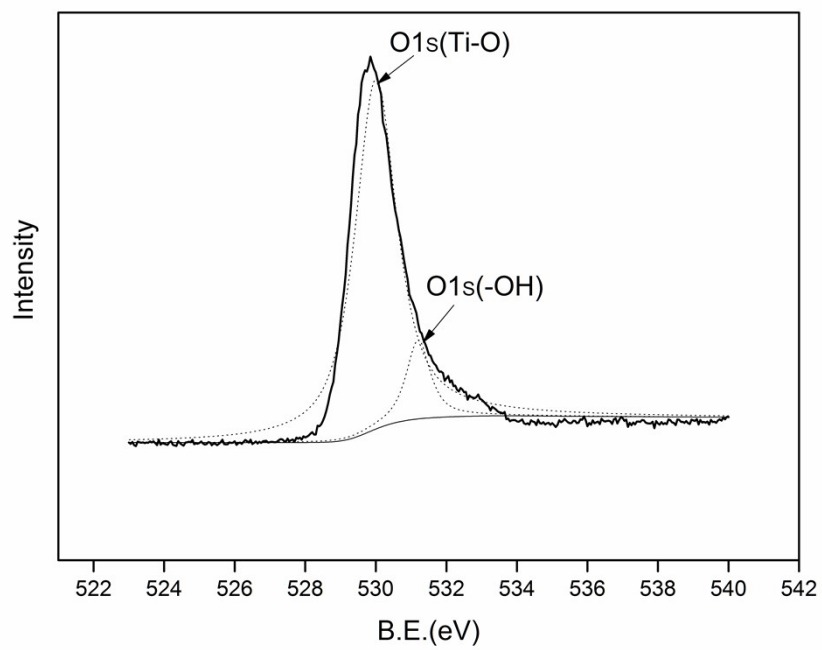

Figure S2. High resolution XPS spectra of the O 1s region for the TiO<sub>2</sub> coated mesh.

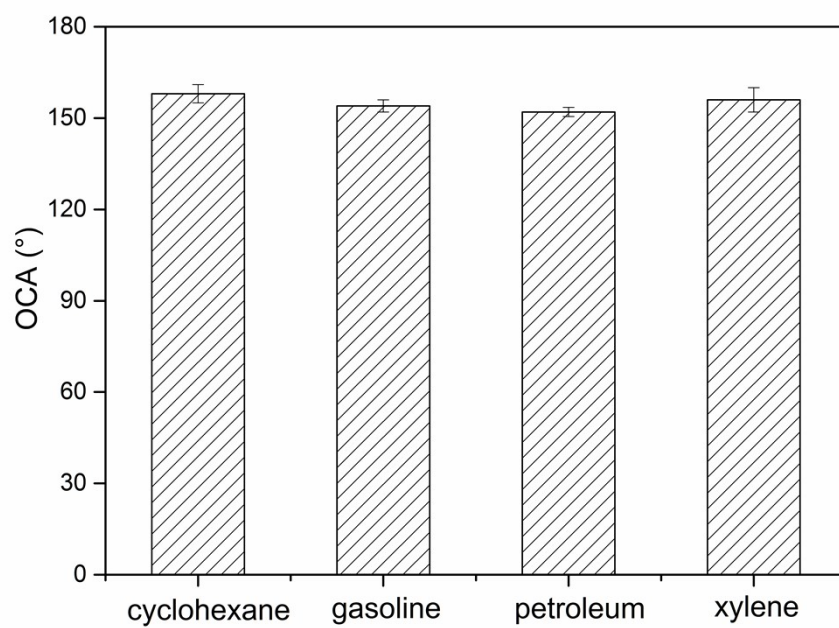

Figure S3. Underwater OCAs of various oils on the TiO<sub>2</sub> coated mesh.

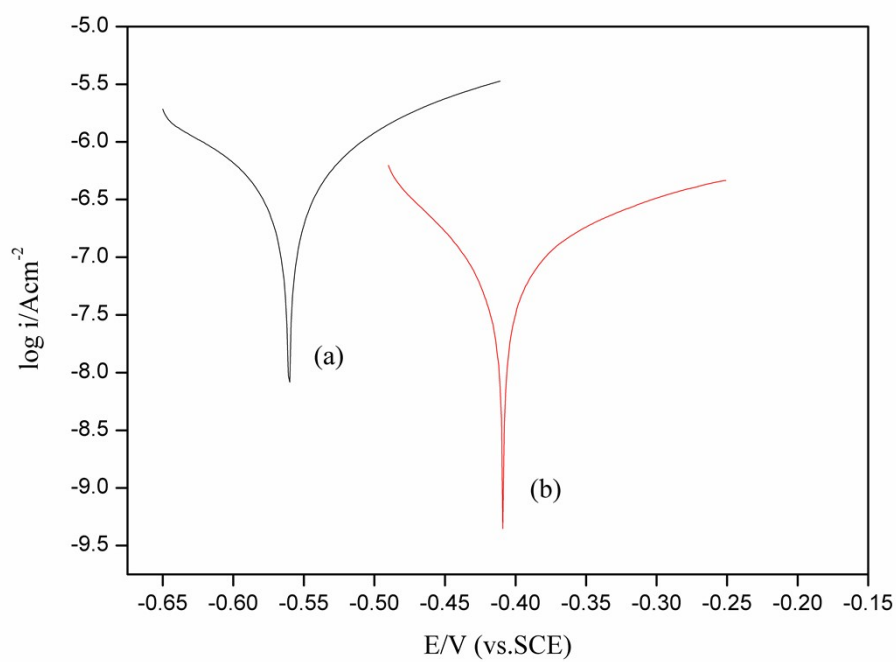

Figure S4. Tafel polarization curves of (a) original stainless mesh and (b)  $TiO_2$  coated mesh. The polarization curve was measured in 0.5 M NaCl solution using CHI660A Electrochemical Measurement System. The samples were used as working electrodes, and the test cell included a platinum auxiliary electrode and a saturated calomel reference electrode (SCE).

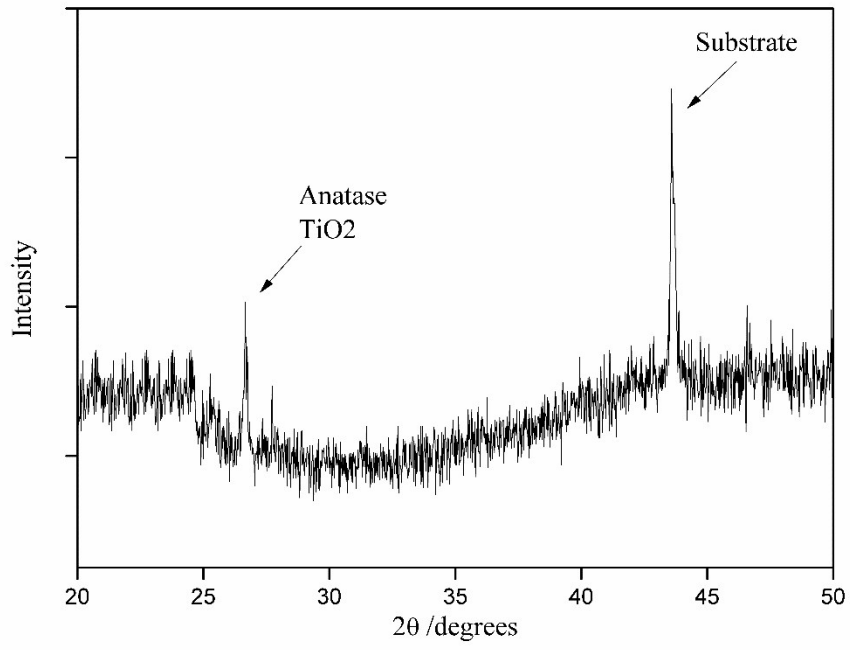

Figure S5. The XRD patterns of TiO<sub>2</sub> coated mesh.
